# Supplementary material
Source: publisher figshare collection journal article supplement (https://acs.figshare.com/ndownloader/files/5030125)
Supplement: Supplementary file 1 [file 5030125]

## **Supplementary Material**

The Effect of Different Divalent Cations on the Kinetics and Fidelity of RB69 DNA Polymerase.

**Ashwani Kumar Vashishtha and William H. Konigsberg**

From the Department of Molecular Biophysics and Biochemistry, Yale University, New Haven,  
Connecticut 06520-8024

\* To whom correspondence should be addressed:

Prof. William H. Konigsberg

Department of Biophysics and Biochemistry

Yale University

333 Cedar Street

SHM CE-14

New Haven, CT 06520-8024

Telephone: (203) 785-4599

Fax: (203) 785-7979

E-mail: [William.konigsberg@yale.edu](mailto:William.konigsberg@yale.edu)

**This file includes:**

Supplemental Figures S1-S6.

## Supporting Information

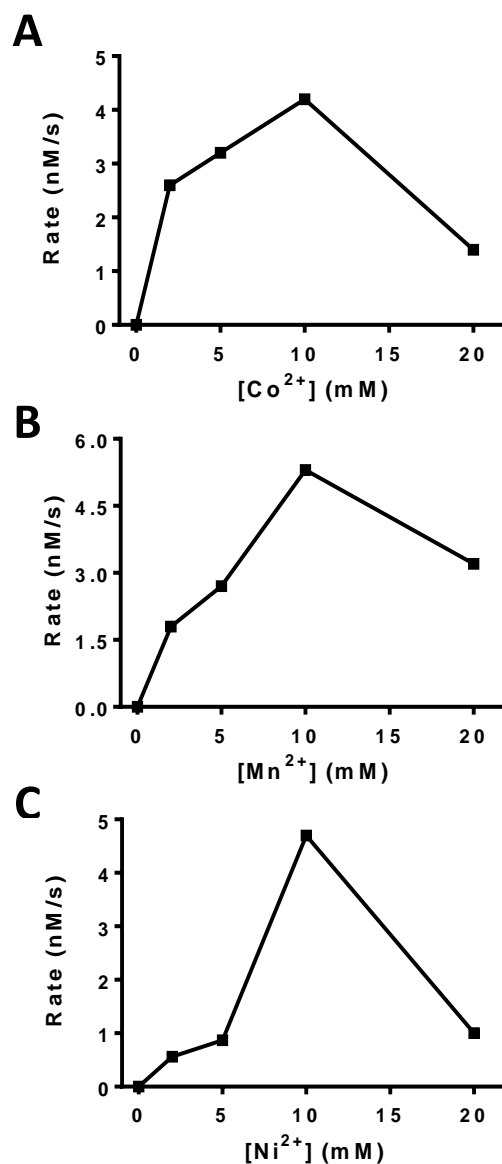

**Figure S1.** Determination of optimum divalent cation concentrations. RB69pol (40 nM) was pre-incubated with DNA<sub>13A</sub> (100 nM) in reaction buffer containing increasing concentrations of the divalent cation (Co<sup>2+</sup>, Mn<sup>2+</sup>, or Ni<sup>2+</sup>) [0, 2, 5, 10, and 20 mM]. Reactions were initiated by adding 500  $\mu$ M dTTP and subsequently quenched with 0.5 M EDTA (pH 8.0) at various times ranging from 10-100 s. All data were obtained at 23 °C. **(A)** Plot of the rate of DNA product formation as a function of [Co<sup>2+</sup>]. **(B)** Plot of the rate of DNA product formation as a function of [Mn<sup>2+</sup>]. **(C)** Plot of the rate of DNA product formation as a function of [Ni<sup>2+</sup>].

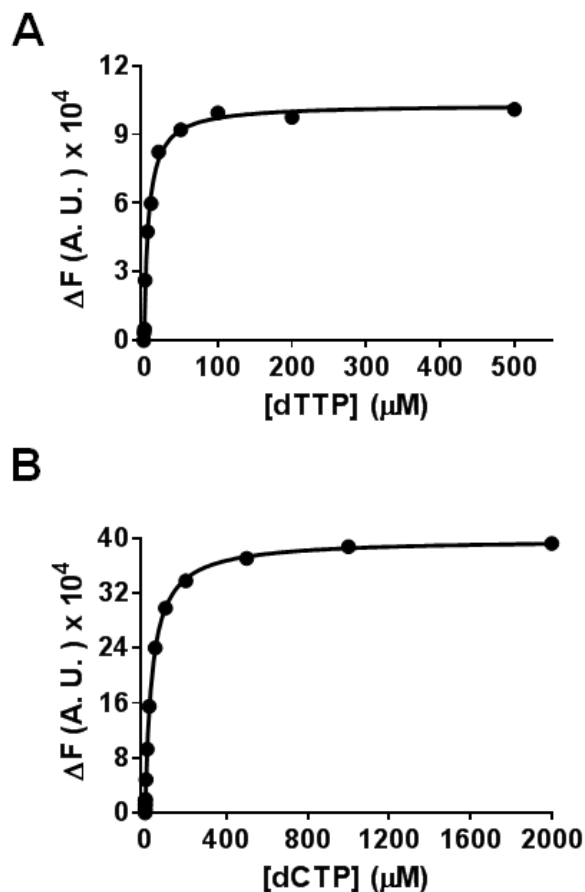

**Figure S2.** Equilibrium fluorescence titration plots of the RB69pol-ddP/T complex fluorescence quenching with increasing [dTTP] (or [dCTP]). The concentration of DNA<sub>Pdd</sub> was 200 nM and that of RB69pol was 1  $\mu\text{M}$ . **(A)** Plot showing the change in fluorescence quenching as a function of [dTTP] in the presence of  $\text{Co}^{2+}$ . The concentrations of dTTP used were 0, 0.5, 1, 2, 5, 10, 20, 50, 100, 200, and 500  $\mu\text{M}$ . Fluorescence intensities at 365 nm were fitted to a hyperbolic equation. Titration of dTTP vs. 2AP in the presence of 10 mM  $\text{Co}^{2+}$  gives a  $K_{d,g} = 5.8 \pm 0.7 \mu\text{M}$ . **(B)** Plot showing the change in fluorescence quenching as a function of [dCTP] in the presence of  $\text{Mn}^{2+}$ . The concentrations of dCTP used were 0, 0.02, 0.04, 0.1, 0.25, 0.5, 1, 2, 5, 10, 20, 50, 100, 200, 500, 1000, and 2000  $\mu\text{M}$ . Fluorescence intensities at 365 nm were fitted to a hyperbolic equation to obtain a  $K_{d,g} = 33 \pm 6 \mu\text{M}$ . ( $\Delta F$ ) represents the change in fluorescence in the direction of quenching and  $\Delta F$  increases with an increase in [dTTP] (or [dCTP]).

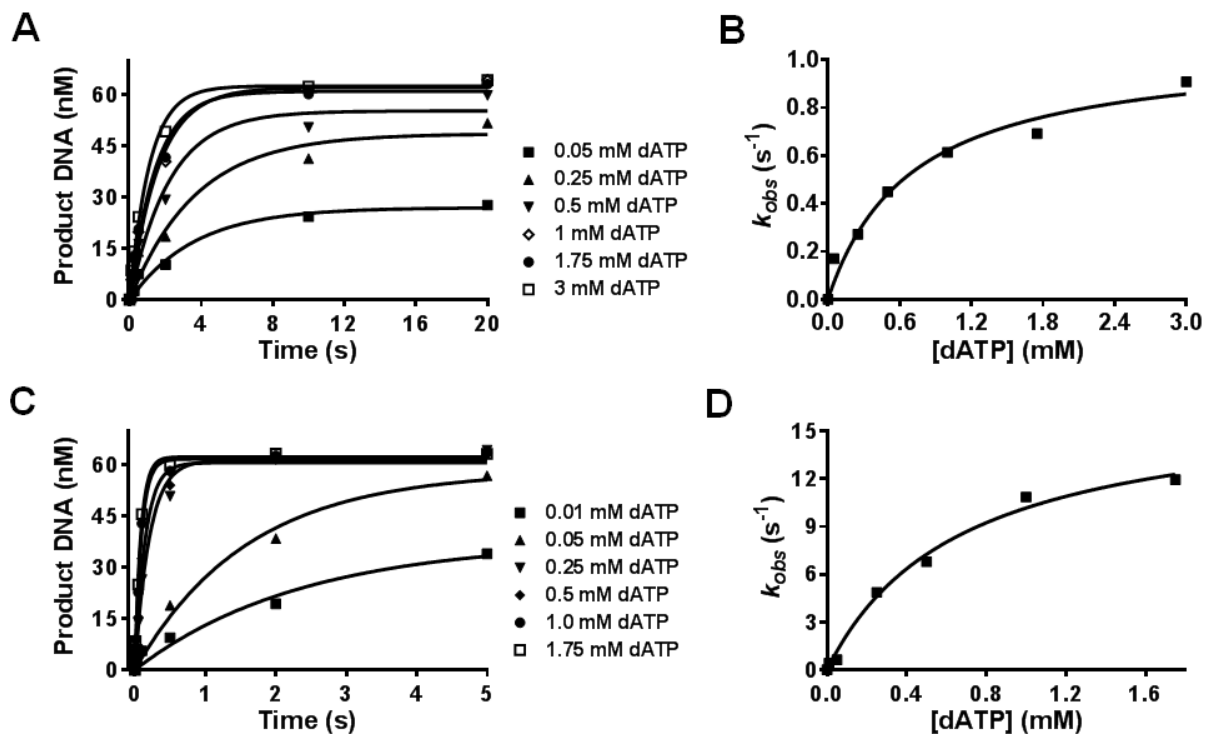

**Figure S3.** Concentration dependence of the rate of dATP incorporation opposite dT past DNA containing dA/dC mismatch at the primer terminus. RB69pol (1  $\mu\text{M}$ ) was pre-incubated with DNA<sub>ACMM</sub> (80 nM) in reaction buffer and was mixed with increasing concentrations of dATP [0.05, 0.25, 0.5, 1, 1.75, and 3 mM] containing 10 mM  $Mg^{2+}$ . Reactions were quenched with 0.5 M EDTA (pH 8.0) at various times ranging from 0.1-20 s. All data were obtained at 23 °C. **(A)** Plots of the amount of extended DNA product obtained as a function of time at various [dATP] in 10 mM  $Mg^{2+}$ . Points are experimental, while curves are based on a fit of the data to Eq.1. **(B)** The single exponential rates obtained were plotted as a function of [dATP] and fitted to Eq. 2 to obtain a  $k_{pol}$  of  $1.1 \pm 0.1 \text{ s}^{-1}$  and a  $K_{d,app}$  of  $0.8 \pm 0.2 \text{ mM}$ . RB69pol (1  $\mu\text{M}$ ) was pre-incubated with DNA<sub>ACMM</sub> (80 nM) in reaction buffer and was mixed with increasing concentrations of dATP [0.01, 0.05, 0.25, 0.5, 1.0, and 1.75 mM] containing 10 mM  $Mn^{2+}$ . Reactions were quenched with 0.5 M EDTA (pH 8.0) at various times ranging from 0.04-5 s. **(C)** Plots of the amount of extended DNA product obtained as a function of time at various [dATP] in 10 mM  $Mn^{2+}$ . Points are experimental, while curves are based on a fit of the data to Eq.1. **(D)** The single exponential rates obtained were plotted as a function of [dATP] and fitted to Eq. 2 to obtain a  $k_{pol}$  of  $17 \pm 1 \text{ s}^{-1}$  and a  $K_{d,app}$  of  $0.6 \pm 0.1 \text{ mM}$ .

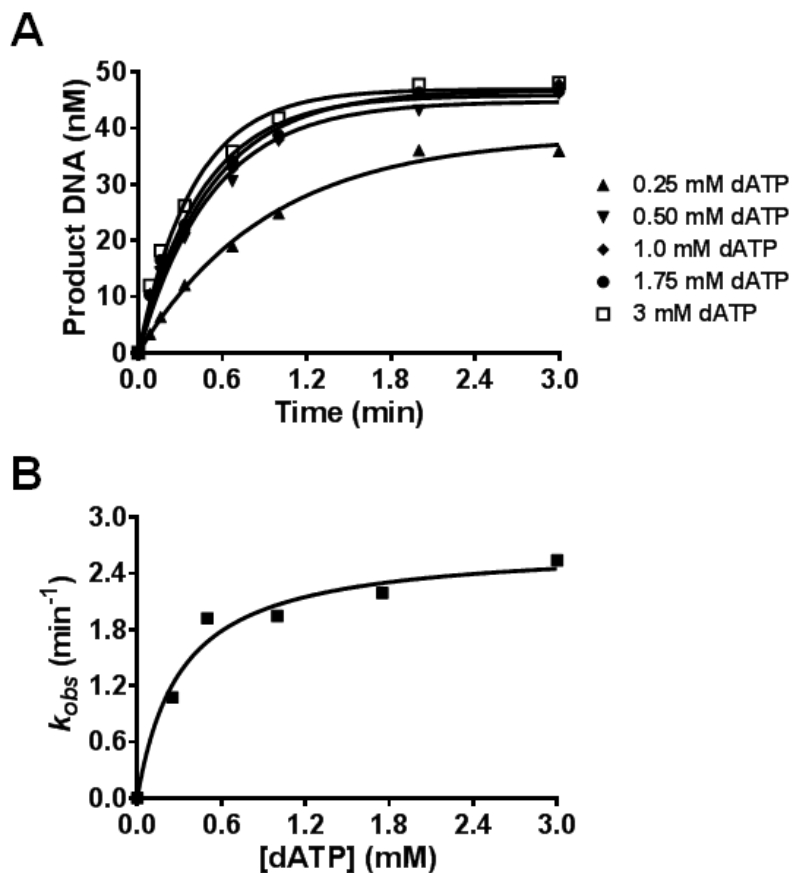

**Figure S4.** Concentration dependence of the rate of dATP incorporation opposite dT past DNA containing dA/dG mismatch at the primer terminus. RB69pol (1  $\mu\text{M}$ ) was pre-incubated with DNA<sub>AGMM</sub> (80 nM) in reaction buffer and was mixed with increasing concentrations of dATP [0.25, 0.5, 1, 1.75, and 3 mM] containing 10 mM  $\text{Co}^{2+}$ . Reactions were quenched with 0.5 M EDTA (pH 8.0) at various times ranging from 0.08-3 min. All data were obtained at 23 °C. **(A)** Plots of the amount of extended DNA product obtained as a function of time at various [dATP] in 10 mM  $\text{Co}^{2+}$ . Points are experimental, while curves are based on a fit of the data to Eq. 1. **(B)** The single exponential rates obtained were plotted as a function of [dATP] and fitted to Eq. 2 to obtain a  $k_{\text{pol}}$  of  $0.05 \pm 0.005 \text{ s}^{-1}$  and a  $K_{\text{d,app}}$  of  $0.31 \pm 0.08 \text{ mM}$ .

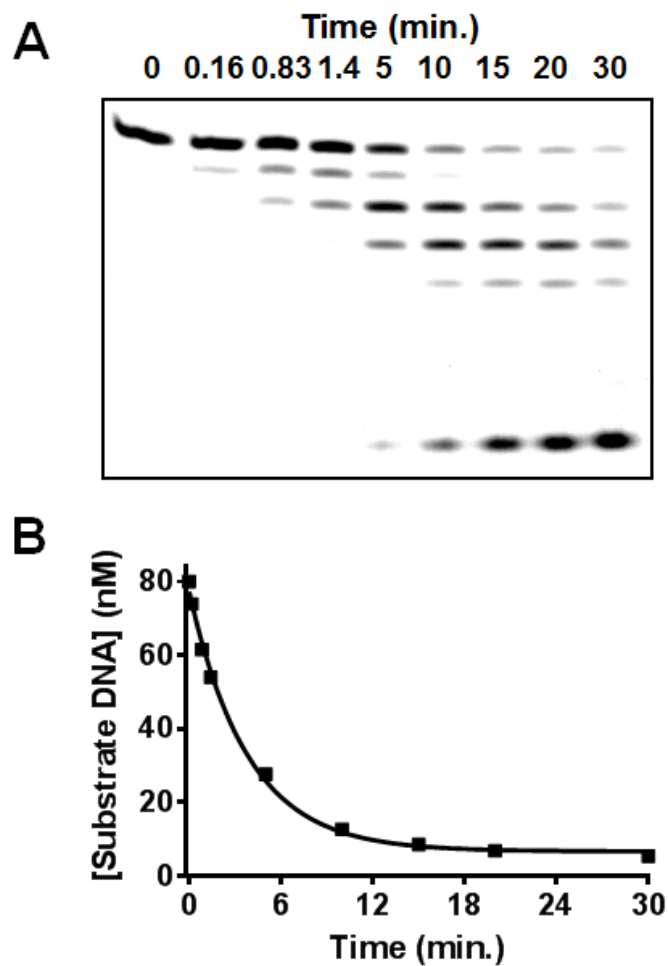

**Figure S5.** Exonuclease activity of RB69pol using  $\text{Ni}^{2+}$ . The reaction mixture contained 80 nM 5'-fluorescein labeled 13/18 mer substrate ( $\text{DNA}_{13\text{A}}$ ), 1  $\mu\text{M}$  RB69pol and 10 mM  $\text{Ni}^{2+}$ . **(A)** Digestion patterns visualized using FUJI scanner with fluorescein as the probe. **(B)** Plot of [Substrate DNA] remaining versus time fit to Eq. 4 to extract a  $k_{\text{exo}}$  of  $0.24 \pm 0.02 \text{ s}^{-1}$ .

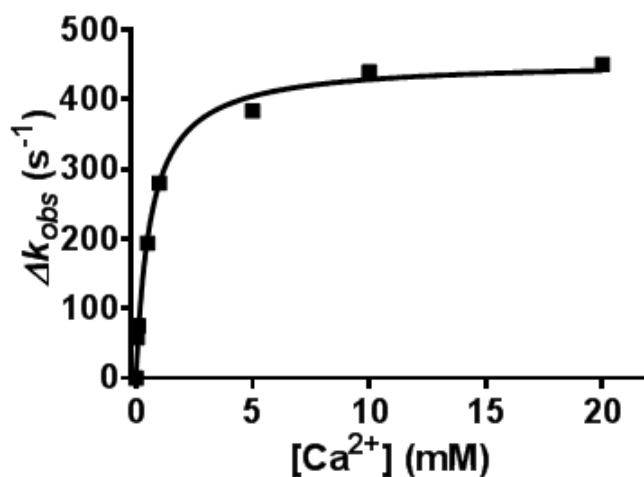

**Figure S6.** Competition between  $\text{Ca}^{2+}$  and  $\text{Mg}^{2+}$  for metal ions binding site. RB69pol (1  $\mu\text{M}$ ) was pre-incubated with DNA<sub>I3A</sub> (80 nM) in reaction buffer and was mixed with dTTP (1 mM) containing  $\text{Mg}^{2+}$  (10 mM), and varying  $[\text{Ca}^{2+}]$  (0.05-20 mM). Reactions were quenched with 0.5 M EDTA (pH 8.0) at various times ranging from 4-100 ms. All data were obtained at 23 °C. Plot of  $\Delta k_{\text{obs}}$  as a function of  $[\text{Ca}^{2+}]$ . Points are experimental, while the curve is based on a fit of the data to Eq. 7 to obtain a  $K_{\text{d,Ca}}$  of  $630 \pm 72 \mu\text{M}$ . ( $\Delta k_{\text{obs}}$ ) represents change in the rate of reaction as a function of increasing  $[\text{Ca}^{2+}]$  and  $\Delta k_{\text{obs}}$  increases with an increase in  $[\text{Ca}^{2+}]$ .
